# Supplementary material for: SWOT analysis of decentralised clinical trials from an ethical, legal, regulatory and operational perspective
Source: BMC Med Ethics. 2026 Feb 9;27:57. doi: 10.1186/s12910-026-01391-w (PMC12990590; doi:10.1186/s12910-026-01391-w)
Supplement: Supplementary file 3 — Supplementary Material 3. [file 12910_2026_1391_MOESM3_ESM.xlsx]

## Sheet: Hoja1
Key Trial Activity	Item	SWOT id
KTA1: implementation of decentralised/ remote (electronic) consent	Development and implementation of applications for eSignature/ID verification	O1. Harmonisation in the regulation and legislation on DCTs
KTA1: implementation of decentralised/ remote (electronic) consent	Harmonized regulations regarding remote consent and authorisation of eIDs/eSignature	O1. Harmonisation in the regulation and legislation on DCTs
KTA1: implementation of decentralised/ remote (electronic) consent	Adjust to literacy of potential participants	S1. Potential benefits of using e-Consent
KTA1: implementation of decentralised/ remote (electronic) consent	Autonomy: easier to withdraw from the study	S4. Greater freedom in decision-making
KTA1: implementation of decentralised/ remote (electronic) consent	Better informed participants through digital means (e.g., video/audio)	S1. Potential benefits of using e-Consent
KTA1: implementation of decentralised/ remote (electronic) consent	Easier to include participants (no travel)	S3. Remote access
KTA1: implementation of decentralised/ remote (electronic) consent	Easier to include participants (no travel)	S6. Less burden for participants
KTA5: self-monitoring	Less participant burden (devices that make continuous monitoring)	S10. Increasing the data collected for both research and safety monitoring
KTA1: implementation of decentralised/ remote (electronic) consent	Easier to store/manage/document the informed consent (easier to monitor/inspect)	S11. Easier to monitor/audit/inspect
KTA1: implementation of decentralised/ remote (electronic) consent	Facilitate increased health literacy (by more easy explanation of health terms)	S1. Potential benefits of using e-Consent
KTA5: self-monitoring	Potential Real World Data gathering	S10. Increasing the data collected for both research and safety monitoring
KTA1: implementation of decentralised/ remote (electronic) consent	Improved recruitment (and retention because they understand better what they sign up for)	S1. Potential benefits of using e-Consent
KTA1: implementation of decentralised/ remote (electronic) consent	Include a quiz to guide IC discussion and check participant understanding	S1. Potential benefits of using e-Consent
KTA1: implementation of decentralised/ remote (electronic) consent	Keeping participants involved during and after trial (e.g., sharing results)	S1. Potential benefits of using e-Consent
KTA1: implementation of decentralised/ remote (electronic) consent	Keeping participants involved during and after trial (e.g., sharing results)	S5. Easier to do some follow-up actions
KTA5: self-monitoring	Prevention of AE, alarm system that might alert the patient to seek help before having symptoms	S10. Increasing the data collected for both research and safety monitoring
KTA1: implementation of decentralised/ remote (electronic) consent	More user-friendly forms – increased satisfaction	S1. Potential benefits of using e-Consent
KTA1: implementation of decentralised/ remote (electronic) consent	Opportunities for re-consenting and providing extra information (e.g., substantial amendment)	S1. Potential benefits of using e-Consent
KTA1: implementation of decentralised/ remote (electronic) consent	Opportunities for re-consenting and providing extra information (e.g., substantial amendment)	S5. Easier to do some follow-up actions
KTA1: implementation of decentralised/ remote (electronic) consent	Opportunity to put layers of information (additional information if wanted)	S1. Potential benefits of using e-Consent
KTA1: implementation of decentralised/ remote (electronic) consent	Participants can do more an independent decision (because no pressure from doctor)	S4. Greater freedom in decision-making
KTA1: implementation of decentralised/ remote (electronic) consent	Participants can easily go back to information/access to information	S1. Potential benefits of using e-Consent
KTA1: implementation of decentralised/ remote (electronic) consent	Participants can easily go back to information/access to information	S5. Easier to do some follow-up actions
KTA1: implementation of decentralised/ remote (electronic) consent	Standardize information	S1. Potential benefits of using e-Consent
KTA1: implementation of decentralised/ remote (electronic) consent	Digital/electronic signatures not acceptable/allowed	T1. Non harmonization of the legislation
KTA1: implementation of decentralised/ remote (electronic) consent	Legislation not harmonized/lacking	T1. Non harmonization of the legislation
KTA1: implementation of decentralised/ remote (electronic) consent	Difficult to check/test understanding	W2. Lack of in-person (on-site) contact
KTA1: implementation of decentralised/ remote (electronic) consent	Exclusion of digital illiterate participants, participants without internet connection or access to connected devices (costs of electricity)	W5. Not suitable for all the CTs, therapeutic areas, participants and activities
KTA1: implementation of decentralised/ remote (electronic) consent	Missing non-verbal communication	W2. Lack of in-person (on-site) contact
KTA1: implementation of decentralised/ remote (electronic) consent	No face to face contact – trust building/building rapport	W13. Dehumanisation of the participant
KTA1: implementation of decentralised/ remote (electronic) consent	No face to face contact – trust building/building rapport	W2. Lack of in-person (on-site) contact
KTA1: implementation of decentralised/ remote (electronic) consent	Costs of the developing electronic consent	W1. Barriers due to use of digital technologies
KTA1: implementation of decentralised/ remote (electronic) consent	Risk of focusing consent only on digital materials and de-emphasising the importance of discussion	W2. Lack of in-person (on-site) contact
KTA1: implementation of decentralised/ remote (electronic) consent	Verification of identity is more difficult	W3. Difficulties to verify the identity
KTA1: implementation of decentralised/ remote (electronic) consent	Verify voluntary consent is more difficult	W2. Lack of in-person (on-site) contact
KTA1: implementation of decentralised/ remote (electronic) consent	You don’t know if there are others in the room during IC discussion	W2. Lack of in-person (on-site) contact
KTA1: implementation of decentralised/ remote (electronic) consent	You don’t know if there are others in the room during IC discussion	W4. Privacy issues
KTA1: implementation of decentralised/ remote (electronic) consent	Exclusion of digital illiterate participants, participants without internet connection or access to connected devices (costs of electricity)	W1. Barriers due to use of digital technologies
KTA1: implementation of decentralised/ remote (electronic) consent	Missing information due to layering	W1. Barriers due to use of digital technologies
KTA1: implementation of decentralised/ remote (electronic) consent	No paper backups (not specific for DCTs)	W1. Barriers due to use of digital technologies
KTA1: implementation of decentralised/ remote (electronic) consent	Risk of focusing consent only on digital materials and de-emphasising the importance of discussion	W1. Barriers due to use of digital technologies
KTA2: decentralised screening of potential trial participant	Bad storage of recordings (privacy issues)	W1. Barriers due to use of digital technologies
KTA2: decentralised screening of potential trial participant	Participants autonomy increased due to the flexibility or have a say on different approaches	O2. Collaboration with local resources
KTA2: decentralised screening of potential trial participant	Potential solution: physical examination done by local GP	O2. Collaboration with local resources
KTA2: decentralised screening of potential trial participant	Easier scheduling	S2. Potential benefits of using digital technologies for other study procedures different to e-consent
KTA2: decentralised screening of potential trial participant	Easier scheduling	S3. Remote access
KTA2: decentralised screening of potential trial participant	Less burden for a selected group of people	S6. Less burden for participants
KTA2: decentralised screening of potential trial participant	Less burden for the participants (no travel to the site)	S6. Less burden for participants
KTA2: decentralised screening of potential trial participant	Less travel burden for IMP administration	S6. Less burden for participants
KTA2: decentralised screening of potential trial participant	Participant would feel more comfortable in their own environment	S3. Remote access
KTA2: decentralised screening of potential trial participant	Participant would feel more comfortable in their own environment	S6. Less burden for participants
KTA2: decentralised screening of potential trial participant	Possibility to collect information from the participants' environment that would not be captured on site.	S7. Easier to detect external factors that would go unnoticed in visits performed on site
KTA2: decentralised screening of potential trial participant	Recording the examination can lead to better diagnosis	S2. Potential benefits of using digital technologies for other study procedures different to e-consent
KTA2: decentralised screening of potential trial participant	Suitability done by experts without being a burden for the participant (no travel time)	S2. Potential benefits of using digital technologies for other study procedures different to e-consent
KTA2: decentralised screening of potential trial participant	Suitability done by experts without being a burden for the participant (no travel time)	S6. Less burden for participants
KTA2: decentralised screening of potential trial participant	Bad storage of recordings (privacy issues)	W4. Privacy issues
KTA2: decentralised screening of potential trial participant	It is more difficult to build a relationship of trust between the participant and the doctor	W13. Dehumanisation of the participant
KTA2: decentralised screening of potential trial participant	It is more difficult to build a relationship of trust between the participant and the doctor	W2. Lack of in-person (on-site) contact
KTA2: decentralised screening of potential trial participant	Lack of physical examination (just interview)	W2. Lack of in-person (on-site) contact
KTA2: decentralised screening of potential trial participant	Lack of physical examination (just interview)	W5. Not suitable for all the CTs, therapeutic areas, participants and activities
KTA2: decentralised screening of potential trial participant	More burden for a selected group of people	W5. Not suitable for all the CTs, therapeutic areas, participants and activities
KTA2: decentralised screening of potential trial participant	Participant feeling uncomfortable about recording their physical examination (participant does not know who is on the other side of the camera)	W4. Privacy issues
KTA2: decentralised screening of potential trial participant	Privacy aspects (are we invading the privacy of the person's home?)	W4. Privacy issues
KTA2: decentralised screening of potential trial participant	Recording of personal information without consent	W4. Privacy issues
KTA2: decentralised screening of potential trial participant	Researcher verification (the participant might not be able to verify the id of the researcher)	W3. Difficulties to verify the identity
KTA2: decentralised screening of potential trial participant	Safety aspects (do we see what we want to see?)	W2. Lack of in-person (on-site) contact
KTA2: decentralised screening of potential trial participant	Unable to verify underlying conditions that would make the participant not suitable for CT (e.g. alcoholism, physical characteristics not visible by video)	W2. Lack of in-person (on-site) contact
KTA2: decentralised screening of potential trial participant	Incorrect measurements done by the patients (use of technology and devices)	W1. Barriers due to use of digital technologies
KTA2: decentralised screening of potential trial participant	Incorrect measurements done by the patients (use of technology and devices)	W12. Risk of generating invalid data or with questionable quality
KTA2: decentralised screening of potential trial participant	More burden for a selected group of people	W6. Increased burden and responsibility on participants to do some activities themselves
KTA2: decentralised screening of potential trial participant	Noisy background difficulty the interview	W1. Barriers due to use of digital technologies
KTA2: decentralised screening of potential trial participant	Safety aspects (do we see what we want to see?)	W1. Barriers due to use of digital technologies
KTA3: home health visits	Being able to detect other external factors that would not be registered during a clinic visit	S7. Easier to detect external factors that would go unnoticed in visits performed on site
KTA3: home health visits	Comfortable for some participants	S6. Less burden for participants
KTA3: home health visits	Easier to detect ancillary care obligations (extra need of care, environment might be risky for the participant, finding child abuse)	S7. Easier to detect external factors that would go unnoticed in visits performed on site
KTA3: home health visits	Less travel burden (e.g. elderly, children, mobility issues)	S6. Less burden for participants
KTA3: home health visits	Possibility to have the visit in a different place from home	S6. Less burden for participants
KTA3: home health visits	Different levels of nurse certification (not all the nurses are allowed to perform all the procedures)	T4. Professional certifications and qualifications are not homogeneous among countries.
KTA3: home health visits	Barriers to conduct multi-country trial (local regulations)	T1. Non harmonization of the legislation
KTA3: home health visits	Regulators might not have a clear picture of qualifications for the person who performs the home health visit	T4. Professional certifications and qualifications are not homogeneous among countries.
KTA3: home health visits	Shortage of qualified health care professionals who can perform home health visits	T4. Professional certifications and qualifications are not homogeneous among countries.
KTA3: home health visits	Different levels of nurse certification (not all the nurses are allowed to perform all the procedures)	W8. Difficulties in the management and organization configuration of the investigator team
KTA3: home health visits	Biosamples transportation might be risky (temperature)	W9. Difficulties in the management and conservation of the biosamples
KTA3: home health visits	Not all the actions can be performed due to the product characteristics (vaccines, phase I trials)	W5. Not suitable for all the CTs, therapeutic areas, participants and activities
KTA3: home health visits	Oversight issues (third parties performing the visits)	W8. Difficulties in the management and organization configuration of the investigator team
KTA3: home health visits	Participant might be stressed by the visit of a nurse	W4. Privacy issues
KTA3: home health visits	Risk of contamination due to home environment	W9. Difficulties in the management and conservation of the biosamples
KTA3: home health visits	Risk of contamination due to home environment	W7. More burden or risk-taking for the health care providers
KTA3: home health visits	Samples might be ruined by external factors or bad management	W9. Difficulties in the management and conservation of the biosamples
KTA3: home health visits	Shortage of qualified health care professionals who can perform home health visits	W8. Difficulties in the management and organization configuration of the investigator team
KTA3: home health visits	Some PIs would not be willing to delegate activities to the nurses	W8. Difficulties in the management and organization configuration of the investigator team
KTA3: home health visits	They can be perceived as invasive (neighbors know, might think that participant is ill, stigma)	W4. Privacy issues
KTA4: telemedicine visits	Digital exclusion	W1. Barriers due to use of digital technologies
KTA4: telemedicine visits	Caregivers might be included in the call or follow-up instructions	S2. Potential benefits of using digital technologies for other study procedures different to e-consent
KTA4: telemedicine visits	Caregivers might be included in the call or follow-up instructions	S3. Remote access
KTA4: telemedicine visits	Easier inclusion of participants	S3. Remote access
KTA4: telemedicine visits	Easier inclusion of participants	S6. Less burden for participants
KTA5: self-monitoring	Thresholds that trigger response (for faster reactions in case of safety issues)	S10. Increasing the data collected for both research and safety monitoring
KTA4: telemedicine visits	Flexible scheduling	S2. Potential benefits of using digital technologies for other study procedures different to e-consent
KTA4: telemedicine visits	Flexible scheduling	S3. Remote access
KTA4: telemedicine visits	Flexible scheduling	S5. Easier to do some follow-up actions
KTA4: telemedicine visits	Good for follow-up visits (clarification of question that the participant might have)	S5. Easier to do some follow-up actions
KTA4: telemedicine visits	Good for follow-up visits (clarification of question that the participant might have)	S6. Less burden for participants
KTA4: telemedicine visits	Less burden (travel time)	S6. Less burden for participants
KTA4: telemedicine visits	No waiting times at sites	S6. Less burden for participants
KTA4: telemedicine visits	Possibility to have the visit in a different place from home	S2. Potential benefits of using digital technologies for other study procedures different to e-consent
KTA4: telemedicine visits	Possibility to have the visit in a different place from home	S3. Remote access
KTA4: telemedicine visits	Possibility to have the visit in a different place from home	S6. Less burden for participants
KTA4: telemedicine visits	Possibility to include several professionals in the same call	S2. Potential benefits of using digital technologies for other study procedures different to e-consent
KTA4: telemedicine visits	Possibility to include several professionals in the same call	S3. Remote access
KTA4: telemedicine visits	Lack of experience, expertise, guidance, habits and evidence on how to assess this and other DCT elements	T1. Non harmonization of the legislation
KTA4: telemedicine visits	Lack of experience, expertise, guidance, habits and evidence on how to assess this and other DCT elements	T2. Lack of specific knowledge and accumulated experience for ethical, legal and regulatory assessment of DCTs
KTA4: telemedicine visits	Legislation at the national level barriers and make a difference on the implementation of telemedicine	T1. Non harmonization of the legislation
KTA4: telemedicine visits	Burden for the investigator team if increase frequency of unscheduled telemedicine visits	W7. More burden or risk-taking for the health care providers
KTA4: telemedicine visits	Data protection	W4. Privacy issues
KTA4: telemedicine visits	Digital exclusion	W5. Not suitable for all the CTs, therapeutic areas, participants and activities
KTA4: telemedicine visits	Lack of physical examination	W2. Lack of in-person (on-site) contact
KTA4: telemedicine visits	Medical confidentiality	W4. Privacy issues
KTA4: telemedicine visits	Privacy issues (you don't know if there are others in the room)	W4. Privacy issues
KTA4: telemedicine visits	Inequality on having internet connection	W1. Barriers due to use of digital technologies
KTA4: telemedicine visits	Internet connection or devices failure might difficult the consult	W1. Barriers due to use of digital technologies
KTA4: telemedicine visits	Recording might be done wrong (lack of SOPs)	W4. Privacy issues
KTA4: telemedicine visits	Risk of missing underlying conditions that might not be detected by video	W2. Lack of in-person (on-site) contact
KTA4: telemedicine visits	Verification of identity	W2. Lack of in-person (on-site) contact
KTA4: telemedicine visits	Verification of identity	W3. Difficulties to verify the identity
KTA4: telemedicine visits	Recording might be done wrong (lack of SOPs)	W1. Barriers due to use of digital technologies
KTA4: telemedicine visits	Recording might be done wrong (lack of SOPs)	W12. Risk of generating invalid data or with questionable quality
KTA8: remote safety monitoring	Early detection of AEs	S10. Increasing the data collected for both research and safety monitoring
KTA8: remote safety monitoring	Real time monitoring detecting different biomarkers before the participant shows symptoms (lifting burden from the participants)	S10. Increasing the data collected for both research and safety monitoring
KTA1: implementation of decentralised/ remote (electronic) consent	Easier to include participants (no travel)	S8. Reach more geographically dispersed and diverse populations
KTA1: implementation of decentralised/ remote (electronic) consent	More diverse populations (opportunity to include people from any part of the territory).	S8. Reach more geographically dispersed and diverse populations
KTA5: self-monitoring	Less participant burden (devices that make continuous monitoring)	S2. Potential benefits of using digital technologies for other study procedures different to e-consent
KTA5: self-monitoring	Participant autonomy	S2. Potential benefits of using digital technologies for other study procedures different to e-consent
KTA5: self-monitoring	Potential Real World Data gathering	S2. Potential benefits of using digital technologies for other study procedures different to e-consent
KTA5: self-monitoring	Prevention of AE, alarm system that might alert the patient to seek help before having symptoms	S2. Potential benefits of using digital technologies for other study procedures different to e-consent
KTA5: self-monitoring	Thresholds that trigger response (for faster reactions in case of safety issues)	S2. Potential benefits of using digital technologies for other study procedures different to e-consent
KTA5: self-monitoring	Use of electronic Patient Reported Outcomes (e-PROs)	S2. Potential benefits of using digital technologies for other study procedures different to e-consent
KTA5: self-monitoring	Prevention of AE, alarm system that might alert the patient to seek help before having symptoms	S5. Easier to do some follow-up actions
KTA5: self-monitoring	Use of electronic Patient Reported Outcomes (e-PROs)	S5. Easier to do some follow-up actions
KTA5: self-monitoring	Less participant burden (devices that make continuous monitoring)	S6. Less burden for participants
KTA5: self-monitoring	Participant autonomy	S6. Less burden for participants
KTA4: telemedicine visits	Easier inclusion of participants	S8. Reach more geographically dispersed and diverse populations
KTA1: implementation of decentralised/ remote (electronic) consent	Facilitate increased health literacy (by more easy explanation of health terms)	S9. Improvement of participants' health and digital literacy skills
KTA5: self-monitoring	Improve digital literacy for health improvement	S9. Improvement of participants' health and digital literacy skills
KTA5: self-monitoring	Post trial access (after trial access to device, how to deal with that?)	T2. Lack of specific knowledge and accumulated experience for ethical, legal and regulatory assessment of DCTs
KTA5: self-monitoring	Time from participant (reimbursement)	T2. Lack of specific knowledge and accumulated experience for ethical, legal and regulatory assessment of DCTs
KTA5: self-monitoring	Over regulation (use of apps, devices might be overused on DCTs)	T3. Regulatory requirements due to the use of multiple medical devices in DCTs (such as applications and devices used in DCTs)
KTA5: self-monitoring	Difficult to identify devices failure	W1. Barriers due to use of digital technologies
KTA5: self-monitoring	Electricity, internet, reimbursement	W1. Barriers due to use of digital technologies
KTA5: self-monitoring	Data waste (too much necessary or unnecessary data, data overload, lack of validated process on how to draw inferences/analysis)	W11. Generation of unnecessary data for the research
KTA5: self-monitoring	Data waste (too much necessary or unnecessary data, data overload, lack of validated process on how to draw inferences/analysis)	W12. Risk of generating invalid data or with questionable quality
KTA5: self-monitoring	Difficult to identify devices failure	W12. Risk of generating invalid data or with questionable quality
KTA5: self-monitoring	Participant identification (somebody else can use the device, or collect other data)	W3. Difficulties to verify the identity
KTA5: self-monitoring	Data protection issues (data might be stored at vendors servers)	W4. Privacy issues
KTA5: self-monitoring	Burden on responsibilities performing the tasks or performing the monitoring	W6. Increased burden and responsibility on participants to do some activities themselves
KTA5: self-monitoring	Surveillance issues	W7. More burden or risk-taking for the health care providers
KTA6: delivery and return of investigational product	Data integrity issues	W12. Risk of generating invalid data or with questionable quality
KTA6: delivery and return of investigational product	Low burden for patients to pick-up the IMP (travel time, mobility)	S6. Less burden for participants
KTA6: delivery and return of investigational product	GCP concerns (proof of receipt, how to deal with it is a regulatory requirement)	T2. Lack of specific knowledge and accumulated experience for ethical, legal and regulatory assessment of DCTs
KTA6: delivery and return of investigational product	Data protection concerns (sharing participant data with subcontractors)	W4. Privacy issues
KTA6: delivery and return of investigational product	GCP concerns (proof of receipt, how to deal with it is a regulatory requirement)	W10. Difficulties in the management, conservation and administration of the IMP
KTA6: delivery and return of investigational product	GCP concerns (proof of receipt, how to deal with it is a regulatory requirement)	W4. Privacy issues
KTA6: delivery and return of investigational product	GMP concern (IMP temperature, etc.)	W10. Difficulties in the management, conservation and administration of the IMP
KTA6: delivery and return of investigational product	Losing pharmacist oversight (safety, and quality of the product)	W10. Difficulties in the management, conservation and administration of the IMP
KTA6: delivery and return of investigational product	Losing pharmacist oversight (safety, and quality of the product)	W8. Difficulties in the management and organization configuration of the investigator team
KTA7: clinical trial oversight	Complexity of certification schemes for third parties	T4. Professional certifications and qualifications are not homogeneous among countries.
KTA7: clinical trial oversight	High burden of responsibility for the PI (more third parties to take care of)	W8. Difficulties in the management and organization configuration of the investigator team
KTA7: clinical trial oversight	PI responsibility complexity	W8. Difficulties in the management and organization configuration of the investigator team
KTA7: clinical trial oversight	Potential lack of medical context/difficult to build a relationship with the PI	W2. Lack of in-person (on-site) contact
KTA7: clinical trial oversight	Transfer of responsibility to the participant might lead to risk of no detecting adverse events	W5. Not suitable for all the CTs, therapeutic areas, participants and activities
KTA7: clinical trial oversight	Transfer of responsibility to the participant might lead to risk of no detecting adverse events	W6. Increased burden and responsibility on participants to do some activities themselves
KTA5: self-monitoring	Participant autonomy	S9. Improvement of participants' health and digital literacy skills
KTA8: remote safety monitoring	Early detection of AEs	S2. Potential benefits of using digital technologies for other study procedures different to e-consent
KTA8: remote safety monitoring	Early detection of AEs	S5. Easier to do some follow-up actions
KTA5: self-monitoring	Post trial access (better adherence to treatment after trial)	S9. Improvement of participants' health and digital literacy skills
KTA8: remote safety monitoring	Real time monitoring detecting different biomarkers before the participant shows symptoms (lifting burden from the participants)	S2. Potential benefits of using digital technologies for other study procedures different to e-consent
KTA8: remote safety monitoring	Real time monitoring detecting different biomarkers before the participant shows symptoms (lifting burden from the participants)	S5. Easier to do some follow-up actions
KTA8: remote safety monitoring	Concerns that might substitute on person context and rely on only devices	W13. Dehumanisation of the participant
KTA8: remote safety monitoring	Concerns that might substitute on person context and rely on only devices	W2. Lack of in-person (on-site) contact
KTA8: remote safety monitoring	Not applicable to all the trial (also applicable to other DCT activities)	W5. Not suitable for all the CTs, therapeutic areas, participants and activities
